# Supplementary material for: Phage Resistance Is Associated with Decreased Virulence in KPC-Producing Klebsiella pneumoniae of the Clonal Group 258 Clade II Lineage
Source: MDPI journal article supplement (doi:10.3390/microorganisms9040762), 2021-04-06
Supplement: s1 [file s1]

**Table S1.** Antibiotic susceptibility profiles of *K. pneumoniae* KKBO-1 and BO-FR-1. Assignments in the S or R categories for each antibiotic is reported near to MIC values. NC means not categorizable for the absence of clinical breakpoints.

| Antibiotic                                 | MIC (mg/l) |            |
|--------------------------------------------|------------|------------|
|                                            | KKBO-1     | BO-FR-1    |
| Piperacillin/Tazobactam <sup>a</sup>       | >128/4 (R) | >128/4 (R) |
| Amoxicillin/Clavulanate <sup>b</sup>       | >64/2 (R)  | >64/2 (R)  |
| Cefepime                                   | >16 (R)    | >16 (R)    |
| Ceftriaxone                                | >4 (R)     | >4 (R)     |
| Ceftazidime                                | >64 (R)    | >64 (R)    |
| Ceftazidime/Avibactam <sup>c</sup>         | 2/4 (S)    | 2/4 (S)    |
| Ceftolozane/Tazobactam <sup>a</sup>        | >64/4 (R)  | >64/4 (R)  |
| Ertapenem                                  | >2 (R)     | >2 (R)     |
| Meropenem <sup>1</sup>                     | 16 (R)     | 16 (R)     |
| Tigecycline                                | 0.5 (NC)   | 0.5 (NC)   |
| Nitrofurantoin                             | >64 (NC)   | >64 (NC)   |
| Fosfomycin <sup>2</sup>                    | 8 (S)      | 8 (S)      |
| Trimethoprim/Sulfamethoxazole <sup>d</sup> | >8/152 (R) | >8/152 (R) |
| Amikacin                                   | >16 (R)    | >16 (R)    |
| Gentamicin                                 | ≤1 (S)     | ≤1 (S)     |
| Ciprofloxacin                              | >1 (R)     | >1 (R)     |
| Levofloxacin                               | >8 (R)     | >8 (R)     |
| Colistin                                   | 1 (S)      | 1 (S)      |

<sup>a</sup> Tazobactam at fixed concentration of 4 mg/l

<sup>b</sup> Clavulanate at fixed concentration of 2 mg/l

<sup>c</sup> Avibactam at fixed concentration of 4 mg/l

<sup>d</sup> Trimethoprim/sulfamethoxazole at 1:19 proportion

<sup>1</sup> Breakpoints for indications other than meningitis have been applied

<sup>2</sup> Breakpoints for intravenous administration have been applied

**Table S2.** Host specificity of phages belonging to the *Drulisvirus* genus reported by the International Committee on Taxonomy of Viruses (last accessed on 18/02/2021).

| Host<br>(Genus)    | Phage Name                  | Reported Host-<br>Specificity | Reference |
|--------------------|-----------------------------|-------------------------------|-----------|
| <i>Escherichia</i> | Minorna                     | -                             | [32]      |
| <i>Klebsiella</i>  | AltoGao                     | -                             | [33]      |
| <i>Klebsiella</i>  | φBO1E                       | CPS <sub>KKBO-1</sub>         | [10]      |
| <i>Klebsiella</i>  | F19                         | -                             | -         |
| <i>Klebsiella</i>  | K244                        | -                             | -         |
| <i>Klebsiella</i>  | Kp2                         | -                             | -         |
| <i>Klebsiella</i>  | KP34                        | -                             | [34]      |
| <i>Klebsiella</i>  | KP-Rio/2015                 | -                             | [35]      |
| <i>Klebsiella</i>  | KpS2                        | -                             | [36]      |
| <i>Klebsiella</i>  | KpV41                       | CPS <sub>K1</sub>             | [28]      |
| <i>Klebsiella</i>  | KpV48                       | broad                         | [28]      |
| <i>Klebsiella</i>  | KpV71                       | CPS <sub>K1</sub>             | [28]      |
| <i>Klebsiella</i>  | KpV74                       | CPS <sub>K2</sub>             | [28]      |
| <i>Klebsiella</i>  | KpV475                      | CPS <sub>K1</sub>             | [28]      |
| <i>Klebsiella</i>  | KPV811                      | -                             | [37]      |
| <i>Klebsiella</i>  | myPSH1235                   | broad                         | [29]      |
| <i>Klebsiella</i>  | SU503                       | -                             | [38]      |
| <i>Klebsiella</i>  | SU552A                      | -                             | [38]      |
| <i>Shigella</i>    | SFN6B                       | -                             | -         |
| <i>Klebsiella</i>  | πVLC1-4 <sup>1</sup>        | CPS <sub>K22</sub>            | [30]      |
| <i>Klebsiella</i>  | vB_KpnP_IME337 <sup>1</sup> | CPS <sub>KN2</sub>            | [31]      |

<sup>1</sup>Not yet included in the ICTV list.
