# Supplementary material for: Phage Resistance Is Associated with Decreased Virulence in KPC-Producing Klebsiella pneumoniae of the Clonal Group 258 Clade II Lineage
Source: MDPI journal article supplement (doi:10.3390/microorganisms9040762), 2021-04-06
Supplement: s1 [file s1]

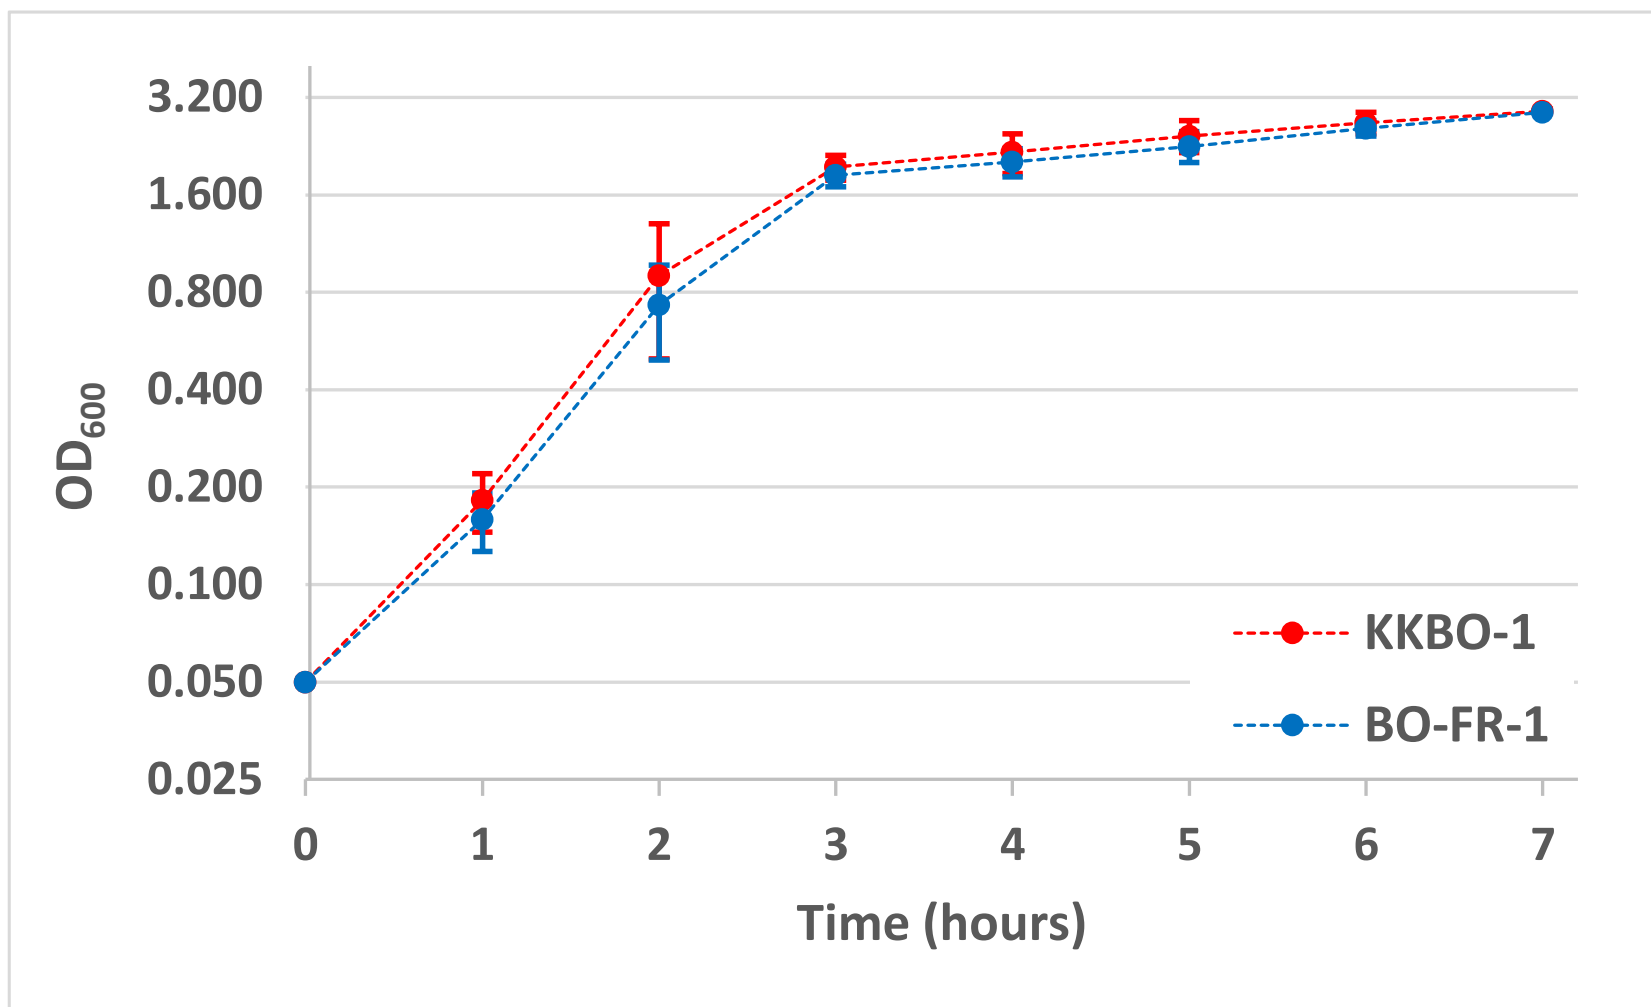

**Figure S2.** Growth curves of the phage-susceptible (red) and phage-resistant (blue) strains. Data are from the mean of three independent experiments. Vertical bars represent one standard deviation.
